# Supplementary material for: Dysfunctional Presynaptic M2 Receptors in the Presence of Chronically High Acetylcholine Levels: Data from the PRiMA Knockout Mouse
Source: PLoS One. 2015 Oct 27;10(10):e0141136. doi: 10.1371/journal.pone.0141136 (PMC4624712; doi:10.1371/journal.pone.0141136)
Supplement: S1 File — (XLSX) [file pone.0141136.s001.xlsx]

## Sheet: Figure 1
	Figure 1A		WT Str								WT Hip
	-60		0.5	9.9	9.3	10.8	6.84	4.21	10.13		8.8	3	3.1	1.1	6.2	6.04	3.71
	-45		1.2	10	6.8	8.2	2.97	0.1	7.36		10	2.3	3.9	1	2.1	3.19	3.16
	-30		0.9	8.5	11.2	6.9	7.42	1.99	7.36		8.8	3.6	3.1	1	5.9	2.55	2.6
	-15		1	5.7	5.1	5.6	1.18	3.18	4.5		11.3	2.3	2.6	0.8	1.1	5.3	4.21
	0		2.5	4.6	7.9	9.8	5.94	6.68	4.29		8.8	3.6	3.1	1.4	1.5	3.06	5.09
	15		5.4	39.5	38.7	38.5	44.09	20.66	28		36.9	23.6	3.9	10.8	34.2	36.93	63.8
	30		9.6	34.5	47.1	44.9	90.74	25.81	70.4		45.5	103.9	72.1	17.6	91.5	95.49	70.09
	45		7.4	42.2	102.8	65.6	87.04	24.98	57.5		53.6	117.8	69.1	24.9	69	68.79	43.19
	60		11	53.1	106	86.6	115.52	38.84	115.67		73.8	131.6	93.6	32.3	98	69.64	116.25
	75		13.8	55.5	204.3	107.9	133.69	39.62	98.86		83.7	110.9	141.6	54	106	78.81	50.47
	90		17.1	57.5	245.6	133.7	165.12	110.46	105.66		92.3	100.2	155.9	75.6	139.8	118.5	145.34
	105		20.9	59.6	150	141.8	117.51	103.05	152.67		86.1	152.9	105.5	61.1	113	96.19	201.96
	120		16	83	146.9	103.9	135.7	78.59	210.55		59.8	199.2	77.2	66.1	154.7	82.46	79.75
	135		13.4	97.6	123.5	90.7	129.59	58.7	189.41		80.1	154.5	72.5	82.3	129.8	145.27	61.91
	150		10.8	55.5	100.2	85.9	122.13	48.42	142.17		66.1	141.6	83.4	82.3	96.2	107	80.59
	165		8.4	41.8	82.5	85.31	79.34	45.88	87.65		48.9	126.2	69.6	61	114	74.79	65.58
	180		8.8	34.9	74.3	73.8	78.43	48.67	79.98		56	95.7	57.3	50.2	110.6	50.63	84.17
	195		6.9	24.4	59.3	73.9	72.98	66.45	68.62		54	119.6	92.8	41	94	48.73	97.81
	Figure 1B		KO Str								KO Hip
	-60		831	1191.8	1595.4	426.88	454.19	1029.29	1877.98		144.62	208.89	245.69	251.15	212.68	211.86	233.58
	-45		848.9	1376.3	1595.4	622.01	539.09	1308.93	1874.48		166.58	241.11	281.04	206.38	248.09	217.82	277.18
	-30		831	1296.9	2296	763.66	533.57	1281.46	2638.03		209.68	166.02	298.44	112.79	212.68	210.45	223.36
	-15		848.9	1336.8	2357.2	723.98	569.21	1450.53	1877.98		172.01	219.16	153.74	170.66	248.09	202.93	202.8
	0		866.9	1286.2	2217	722.67	533.28	1146.51	1874.48		164.66	188.88	275.46	203.66	212.68	240.94	168.21
	15		1807.5	2008.6	2713.5	2406.4	830.51	2307.78	2501.92		242.08	168.96	427.58	244.45	248.09	723.46	221.76
	30		2168.6	2570.9	2908.3	5498.92	980.82	3643.85	2423.74		1468.22	468.96	507.94	389.71	338.25	937.66	337.57
	45		2502.2	2606.8	3819.6	6763.24	988.27	3418.51	2020.73		1712.14	556.88	976.12	830.36	663.29	1242.98	602.72
	60		3001.1	2149.2	4578.4	6623.99	1047.45	2453.42	2408.26		1016.02	762.14	954.7	887.83	1100.3	1966.53	1236.96
	75		3250.5	2501.3	7476.7	7857.46	1291.23	3790.24	2903.04		925.01	1222.52	1018.8	917.04	1065.17	1538.11	990.31
	90		3500	2794.6	8011.9	8652.11	1272.36	4485.93	2679.39		944.31	1785.43	1082.9	1055.76	1323.01	1339.73	743.66
	105		2033.6	2223	7960.3	9191.14	1256.88	3896.55	2851.44		1112.05	1647.43	1192.53	912.98	2045.58	2567.57	1004.56
	120		2042.3	2185	7453.6	8781.1	1343.41	3921.42	1719.12		1470.01	1456.48	942.8	902.97	1349.61	1674.82	1129.82
	135		2074.6	2105.5	7282.9	8142.41	1213.02	3818.95	1529.28		1679.71	1211.49	897.68	784.6	785.69	1407.79	680.88
	150		2039.2	2204.6	7911.2	7670.17	1249.99	3395.09	1812.46		1124.17	1413.36	835.42	1115.18	752.96	1082.1	891.38
	165		1938.8	1862.3	7125.8	7185.96	1089.57	3598.18	2008.23		1055.01	1598.14	673.88	844.92	735.17	1789.6	680.88
	180		1930.5	1930.1	7332.7	6427.63	1169.7	3824.98	1500.47		998.08	2053.69	647.9	632.9	703.94	1353.02	631.73
	195		1920.9	1997.9	6594.2	6249.28	1203.75	3843.55	2016.5		998.84	1993.69	645.9	629.3	699.96	1323.24	639.15
	Figure 1C		WT Neo								WT Physo
	-45		0.84	0.27	1.0067	1.18	1.87				0.8	0.58	0.36	0.67	0.34	0.72	0.55
	-30		0.87	0.39	0.67	0.72	0.71				0.8	1.94	0.48	0.35	1	0.63	0.29
	-15		1	0.3	1.63	0.91	0.91				0.53	0.99	0.74	0.78	1.74	0.47	0.27
	0		0.52	0.21	0.72	0.42	1.7				0.78	0.72	0.53	0.3	1.92	0.47	0.23
	15		0.41	0.37	0.59	1.32	1.39				9.74	4.58	2.89	9.82	3.51	4.59	1.37
	30		0.3	0.6	0.63	1.8	1.21				8.97	5.91	5.22	8.27	2.58	8.09	3.88
	45		0.66	0.61	0.92	1.41	0.82				4	3.98	5.81	4.18	1.42	3.16	1.7
	60		0.51	1.34	0.81	0.71	0.83				3.55	4.97	2.28	2.27	1.28	2.26	1.04
	75		0.81	0.85	0.62	0.93	1.97				2.07	1.59	1.06	0.92	1.14	1.53	0.94
	90		0.44	0.46	0.95	0.53	2.31				2.85	0.78	1.64	0.56	0.54	1.15	0.46
	105		0.71	0.54	0.98	1.13	0.93				1.88	1.15	0.84	1	0.75	0.86	0.34
	120		0.91	0.61	2.21	0.84	0.84				1.13	1.21	0.63	0.3	0.65	0.73	0.23
	135		0.82	0.52	1.05	0.73	0.68				1.52	1.13	0.43	0.7	0.55	0.43	0.34
	150		0.88	0.55	0.23	0.81	0.91				1.92	0.99	0.28	0.4	0.44	0.58	0.16
	165		0.85	0.22	0.82	0.75	0.89				1.57	0.73	0.45	1.13	0.55	0.56	0.26
	180		0.9	0.29	0.65	0.86	0.89				1.22	0.61	0.33	0.7	0.4	0.66	0.35
	195		0.83	0.36	0.48	0.59	1.08				0.57	0.43	0.64	0.91	0.3	0.23	0.4
	210		0.82	0.55	0.68	0.6	0.9				0.89	0	0.56	0.5	0.2	0.58	0.42
	225		0.52	0.74	0.82	0.44	0.65				0.9	0.32	0.48	0.71	0.37	0.27	0.59
	240		1.27	0.67	0.37	0.41	0.4				0.91	0.48	0.52	0.59	0.41	0.43	0.33
	Figure 1D		KO Neo								KO Physo
	-45		1054	529	1429	559.96					930	635	606	508
	-30		718	476	1314	520.66					1007	911	658	508
	-15		571	531	1323	586.23					845	990	584	482
	0		778	593	1119	586.5					850	1356	938	535
	15		754	592	1137	839.81					2924	4892	3511	2286
	30		692	571	1146	660.92					2771	5727	2332	1601
	45		602	548	1023	824.43					2185	3697	1727	1212
	60		637	503	1095	684.43					1913	2949	1111	1038
	75		604	475	933	608.85					1801	2437	850	1144
	90		568	451	912	625.09					1361	2184	763	910
	105		697	448	976	675.52					1336	1685	706	744
	120		578	464	865	619.16					1044	1686	670	631
	135		655	484	906	562.8					942	1498	580	557
	150		668	421	897	542.15					892	1316	599	538
	165		576	501	923	493.82					807	1425	543	481
	180		645	385	883	520.64					1045	1267	531	457
	195		579	360	1113	477.13					819	1541	592	463
	210		695	377	904	500.22					1013	1184	560	441
	225		568	358	911	483.76					1116	1259	613	437
	240		607	353	865	470.73					966	1394	577	453
	255		623	378	826	483.76					828	1378	547	454
	270		623	361	875	470.73					750	1276	514	454

## Sheet: Figure 2
	Figure 2A		Oxo KO						WT + Neo					WT
	-60		1335.9	1349.4	702.1	1091.2	991		1164	416	672	613.6		1.9	5.3	3.4	3.7
	-45		1464.8	1105.1	547.7	1039.1	946.7		1253	427	694	544.4		1.3	2.4	2.9	6.5
	-30		1665.5	1063.5	769.7	1100.6	957.5		1258	480	653	440.2		1.4	2.8	2.1	4.2
	-15		1027	1288	914.2	907.5	970.1		1372	349	618	517.3		1.1	4.3	1.9	3.6
	0		1284.4	1094.9	982.3	899.8	958.1		1467	376	904	470.8		1.5	2.5	2.2	4.4
	15		1437.5	862.7	1309.8	1017.4	1405.5		1558	363	734	348		0	0	1	1.2
	30		1479.6	1032.8	2089.9	929.4	1260.5		1558	348	751	460.2		0	0	0	0
	45		1150.1	1181.4	1598	1254.8	1249.6		1777	333	731	533.7		0	0	0	0
	60		1087	1152	1809.9	1251.2	946.1		1746	329	866	444.9		0	0	0	0
	75		1066.1	1396.7	1559.7	1757.2	1550.8		1729	324	1001	386.4		0	0	0	0
	90		1012	1447.9	1066.3	2263.2	1569.2		1692	363	1185	449.7		0	1.5	2.2	0
	105		1021.8	1235.2	1520.8	1757.2	1573.7		1528	350	1615	603.5		0.3	2.4	1.5	2.9
	120		1174.9	1473.6	1332.5	1835.2	1439.9		1601	467	1346	671.8		0.6	2.3	1.8	3
	135		929.5	1463.2	1144.1	1913.2	1696.4		1631	440	1410	686.3		1.3	2.3	2	3.4
	150		912.4	1214.4	1377.8	1404.6	1368.2		1428	401	1246	482.9		1.8	2.3	4.5	2.7
	165		852.8	974.4	1100.5	1590.8	1267.7		1343	491	1324	940.8		2.3	1.9	1.9	2.7
	180		978.3	943.6	1304.5	1445.7	1281.6		1454	565	1457	736.2		1.5	2.4	1	1.3
	Figure 2B		KO							WT + Neo					WT
	-45		1266.6	1271	868.53	1177.16	1302.39	742.64		757.75	951.4	899.4	724		6.9	7.2	1.2	3	2.4
	-30		1082.5	1123.5	782.2	1119.53	1182.37	457.11		687.9	744.4	753.25	723		3.2	1	2.9	2.5	4.2
	-15		1274.3	932.6	954.91	1186.65	1190.65	644.42		853.05	759	714.25	472		6.5	8.3	2.5	2	1.6
	0		891.4	866.6	868.55	1152.46	1103.91	502.22		732.25	811.1	630.15	666		6.2	9.4	2.2	3.8	4.4
	15		1016.1	1047.1	550.97	712.31	1089.39	649.46		478.4	551.9	546.05	367		0	1.9	0	0	0
	30		1070.4	570.1	484.62	950.99	793.3	675.59		414.3	458.2	479.4	307		0	0	0	0	1.4
	45		1022.7	519.9	436.55	761.66	684.56	730.79		335.65	395.6	533.55	320		0	0	0	4.6	0
	60		992.7	623.5	731.73	1002.38	537.22	708.01		397.4	417	542.55	314		0	0	0	0	0
	75		995.8	836.5	881.05	1243.27	524.65	662.99		341.8	484.6	644.95	361		0	0	0	0	2.4
	90		1006.4	779.4	878.82	1322.54	557.51	685.98		405.8	505	670	408		0	0	0	0	0
	105		916.8	771.1	930.37	1130.68	513.52	640.01		509.7	584.1	639.3	414		0	0	0	0	0
	120		880	739.1	876.59	1089.29	797.91	688.81		644.8	587.3	721.85	421		0.5	5.1	1.8	1.2	0
	135		872.7	662.8	822.81	912.23	535.02	730		760.75	962.7	763.15	422		0.9	3.9	0	2.7	0
	150		865.4	718.1	619.52	827.57	576.55	318.3		740.25	778.6	804.4	424		2.4	6.4	1.3	2.2	0
	165		902.6	818.1	604.52	891.2	834.24	324		774.95	801.7	804.4	794		2.7	5.1	2.2	1.8	0
	180		801.8	684.2	864.36	1012.26	752.71	390		776.15	816.3	934.85	634		4	8.6	1.5	2.2	0
	195		791.9	640.1	586.93	1133.31	817.32	335.5		739.55	918.5	934.85	474		3.1	6.7	0	1.7	0
	210		726.4	635.6	647.64	917.97	872.61	472		770.8	961.8	934.85	389		5	5.6	1.9	3	0

## Sheet: Figure 3
	Figure 3A		Scop KO						WT + Neo						WT
	-75		1098	1140	1468	2483	1178		424.92	586.99	926.45	789.56	372.4		5.89	1.82	2.73	1.56	6.7
	-60		1071	956	1441	1780	957		465.49	764.39	1102.87	791.71	395.85		5.94	1.6	2.35	2.1	6.86
	-45		1420	929	1078	2176	697		367.48	554.9	674.71	625.58	312.79		5.87	1.4	1.97	0.38	5.11
	-30		1311	874	1458	2573	390		487.32	539.61	994.21	744.05	372.03		2.7	1.01	3.03	2.05	4.25
	-15		1072	1155	1533	1612	401		451.26	552.2	764.67	796.63	398.32		7.88	1.97	1.87	1.2	7.17
	0		950	1171	1552	1612	539		656.94	602.26	1095.78	766.07	383.04		7.25	2.92	1.9	2.05	9.02
	15		825	1234	1630	1444	382		1922.85	1067.62	2073.2	1313.59	656.8		7.7	2.09	2	1.93	3.78
	30		700	1070	1806	2105	749		2643.24	3288.08	5025.63	2723.81	1361.9		9.08	2.09	2.65	1.55	4.76
	45		600	1633	2056	1476	529		4069.2	4154.36	5694.9	3716.15	1858.07		7.98	1.25	2.5	1.18	4.05
	60		531	1323	2087	1091	1811		5126.01	3828.84	6831.7	4087.19	2043.59		6.88	1.75	2.4	1.79	5.02
	75		699	1472	1868	1119	1368		4429.68	4107.18	6061.19	4477.13	2238.56		4.82	2.25	2.29	2.41	4.67
	90		490	1449	1578	1328	903		4570.99	2835.59	5290.69	4831.41	2415.7		3.49	0.64	2.1	2.3	3.55
	105		757	1551	2117	2777	721		3910.73	4236.69	3827.35	4658.7	2329.35		4.13	1.03	1.95	1.68	6.64
	120		923	1574	1982	3009	477		3142.57	3492.54	3305.01	3360.56	1680.28		3.45	1.42	3.1	2.41	5.02
	135		1253	1571	1429	2457	453		2526.97	2854.35	2697.07	2462.86	1231.43		4.23	2.23	2.12	2	4.67
	150		1137	1375	1649	1760	423		1524.06	2522.93	2188.04	2069.48	1034.74		5.01	2.2	1.86	1.7	3.55
	165		1205	1444	1040	1713	426		1397.31	1788.52	1813.74	1740.17	870.09		4.29	2.2	1.31	2	6.6
	180		1110	1487	1185	2164	501		1412.78	1375.22	1689.62	1540.03	770.01		4.97	2.79	2.79	2	4.3
	Figure 3B		KO						WT + Neo						WT
	-45		1613	1730	1999	1563	1349		1347.71	864.6	747.1	997.33	498.67		4.87	2.9	4.44	1.41	2.04
	-30		1568	1575	1804	1511	1466		883.86	892.04	723.1	1332.83	666.41		4.79	2.85	4.68	2.31	2.02
	-15		1523	1368	1493	1362	1413		821.95	751.57	729.65	1375.86	687.93		5.01	2.28	4.26	3.72	1.94
	0		1977	1387	1392	1355	1247		1728.3	825.45	736.15	1361.96	680.98		2.7	1.4	4.7	5.12	2.14
	15		1611	2095	2274	1214	1487		2460.51	3114.95	1717.05	4548.93	2274.47		7.88	1.52	2.52	1.66	2.12
	30		2375	2352	2312	1012	1609		2153.59	5404.44	3753.15	7305.6	3652.8		7.25	4.91	3.03	2.03	2.16
	45		2025	2006	2341	1197	1669		1855.46	4281.36	3869.8	4090.82	2045.41		7.7	3.26	3.53	2.4	3.31
	60		1632	1931	2234	1352	1523		1605.02	3548.12	3937.15	3361.1	1680.55		5.01	2.15	3.98	1.75	1.81
	75		1847	1982	2185	1266	1501		1458.52	2568.78	2770.55	2631.38	1315.69		0.73	2.46	4.37	1.98	2.46
	90		1303	1949	2025	1316	1360		1344.52	2485.39	1902.65	2027.42	1013.71		6.88	2.21	4.86	2.21	1.82
	105		855	1614	2290	1264	1139		1088.33	1787.59	1867.35	1981.72	990.86		4.82	2.24	1.89	1.86	1
	120		1201	1582	1927	1040	1027		1027.07	1634.12	1828.4	2047.6	1023.8		3.49	2.64	5.18	1.86	1.73
	135		1119	1582	1552	895	992		951.02	1926.08	1149.75	1477.53	738.77		4.13	3.08	4.65	1.51	2.16
	150		1197	1626	1458	989	1207		959.82	1475.54	1364.2	1332.83	666.41		3.45	3.51	3.05	1.7	3.31
	165		1107	2170	1484	981	1007		930.63	1322.34	1091.7	1207.35	603.67		4.23	1.59	3.42	1.7	1.81
	180		1142	1564	1671	944	998		880.92	1213.71	1219.6	1409.37	704.68		5.01	1.55	2.81	1.89	2.46

## Sheet: Figure 4
	Figure 4A		ORT (from left to right)
			8	12	13	8		7	9	13	13
			1	4	11	12		1	3	5	8
			5	6	11	8		3	5	3	5
			8	12	5	7		4	6	4	10
			7	5	15	14		4	8	9	19
			14	15	7	7		5	9	7	8
			7	7	9	5		2	8	7	19
			3	2	12	12		1	1	9	16
			14	10	9	9		3	3	10	11
			1	2	9	9		1	6	12	15
			2	3	9	16		9	10	5	11
	Figure 4B		SRT (from left tot right)
			21	7	17	12		7	10	14	22
			23	10	25	12		16	19	8	5
			18	12	22	7		9	13	6	18
			25	14	21	2		13	17	5	8
			34	11	19	8		17	20	9	5
			23	9	18	5		12	18	6	10
			19	14	25	11		11	10	14	13
			17	6	21	4		7	7	8	12
			27	9	29	3		12	19	8	15
			23	7	23	7		7	12	10	23
			23	11	18	5		3	10	5	11
	Figure 4C		PA (from left to right)
			18.4	4.9	93.2	11.9
			8	5.9	27.2	33.5
			11.3	2.4	78.1	23.7
			9	25.4	25	66.3
			19.4	25.2	33.6	128
			3.8	15.3	24	20.16
			4.2	5.8	180	180
			5.3	2.9	20.5	20.7
			18.3	19.2	110.1	180
			14.6	5.6	180	53.3
			20.1	18	48.1	180
